# Supplementary material
Source: PubMed Central journal article supplement (PMC3076315)
Supplement: NIHMS259233-supplement-supp_data.pdf [file NIHMS259233-supplement-supp_data.pdf]

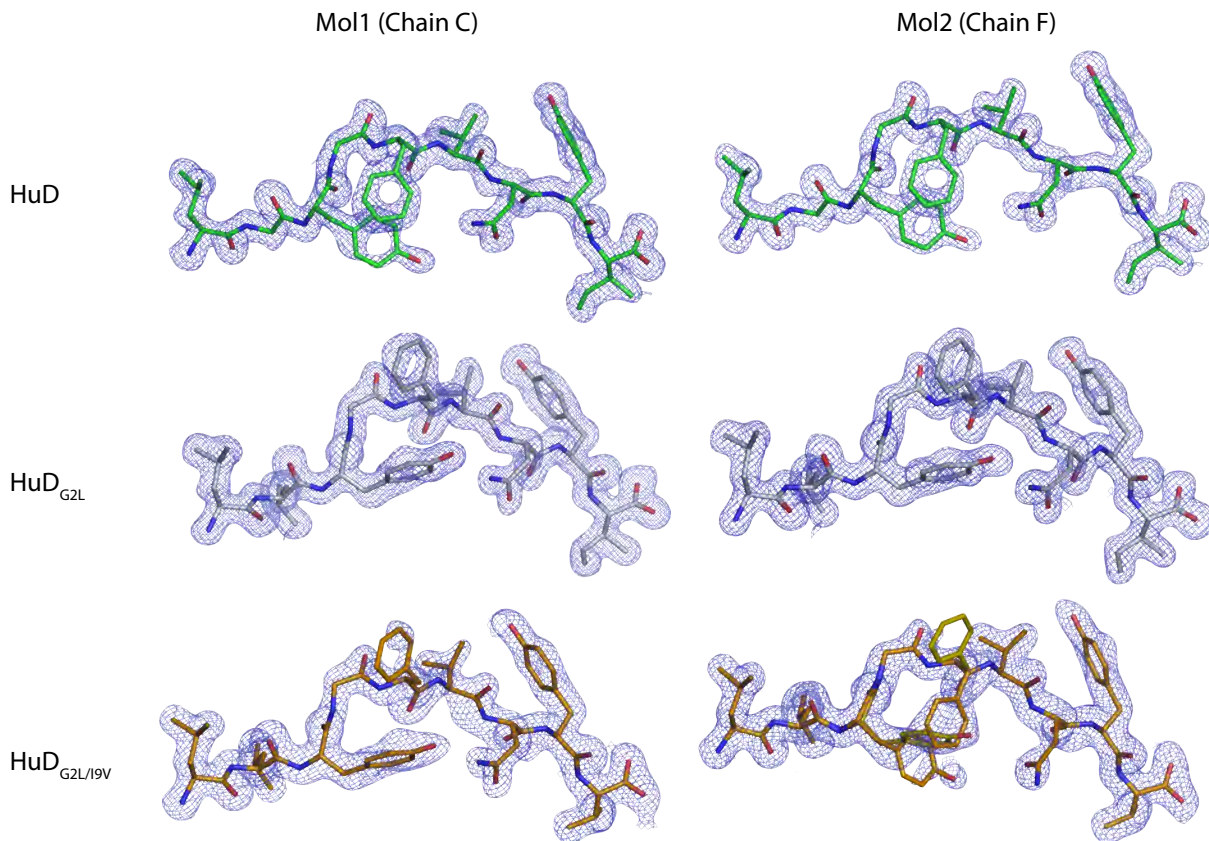

Figure S1. Peptide  $2F_o - F_c$  electron density in the native and anchor modified HuD/HLA-A2 structures. Mol1 (chain C) is for the first molecule in each asymmetric unit; Mol2 (chain F) is for the second molecule in each asymmetric unit.

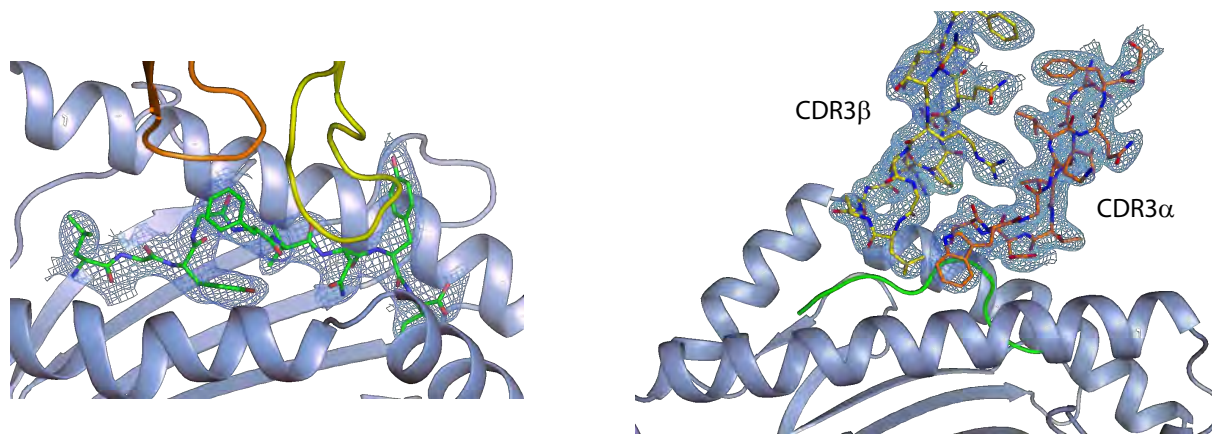

Figure S2. Peptide (left) and CDR3 $\alpha/\beta$  loop (right)  $2F_o - F_c$  electron density in the A6-HuD/HLA-A2 structure.

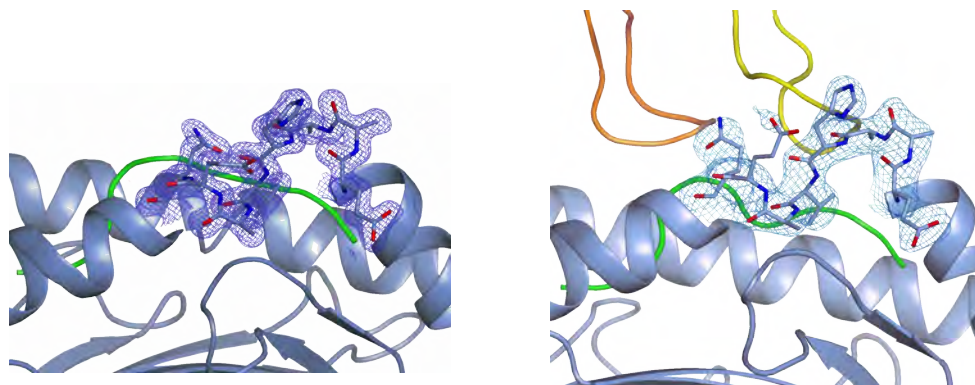

Figure S3.  $2F_o - F_c$  electron density for the  $\alpha 2$  helix linker region in the free HuD/HLA-A2 complex (left; for Mol 1) and in the A6-HuD/HLA-A2 complex (center).
